# Supplementary material
Source: PubMed Central journal article supplement (PMC7686086)
Supplement: NIHMS1614689-supplement-1.pdf [file NIHMS1614689-supplement-1.pdf]

## **Figure S1. Modified Surgical Site Infection Criteria.**

The criteria utilized by investigators to determine eligibility for the primary outcome. Investigators adapted the criteria from those published by the Center for Disease Control, shortening the post-operative period from 30 to 14 days and removing a criterion requiring exploration of the wound for superficial infections.

### Modified Eyelid Superficial Incisional Surgical Site Infection

1. Infection occurs within 14 days after the operation,
2. AND infection involves only skin and subcutaneous tissue of the incision,
3. AND at least one of the following criteria is met:
  - purulent drainage from the incision
  - organisms isolated from an aseptically obtained culture of fluid or tissue from the incision
  - at least one of the following signs or symptoms of infection: pain or tenderness, localized swelling, redness or heat
  - diagnosis of superficial incisional surgical site infection by a surgeon or attending physician

### Modified Eyelid Deep Incisional Surgical Site Infection

1. Infection occurs within 14 days after the operation,
2. AND infection involves deep soft tissues, such as the fascia and muscles,
3. AND at least one of the following criteria is met:
  - purulent drainage from the incision but not from the organ/space of the surgical site
  - a deep incision spontaneously dehisces or is deliberately opened by a surgeon when the patient has at least one of the following signs or symptoms: fever ( $>38^{\circ}\text{C}$ ), localized pain, or tenderness - unless the culture is negative
  - an abscess or other evidence of infection involving the incision is found on direct examination or by histopathologic or radiological examination
  - diagnosis of a deep incisional surgical site infection by a surgeon or attending physician
